# Supplementary material for: A highly sensitive naphthaoxazole-based cell-permeable ratiometric chemodosimeter for hydrazine
Source: Royal Society of Chemistry journal article supplement (doi:10.1039/c6ra15081k), 2016-01-01
Supplement: c6ra15081k1.pdf [file c6ra15081k1.pdf]

*Electronic Supplementary Information (ESI)*

**A naphthoxazole based highly sensitive cell permeable ratiometric chemodosimeter for hydrazine †**

**Shweta,<sup>a</sup> Ajit Kumar,<sup>b</sup> Neeraj,<sup>a</sup> Sharad Kumar Asthana,<sup>a</sup> Anand Prakash,<sup>c</sup> Jagat Kumar Roy,<sup>c</sup> Ida Tiwari,<sup>a</sup> K. K. Upadhyay<sup>a\*</sup>**

<sup>a</sup>*Department of Chemistry, Institute of Science, Banaras Hindu University, Varanasi  
221005, Uttar Pradesh, India.*

<sup>b</sup>*Department of Applied Sciences & Humanities, National Institute of Foundry & Forge Technology, Ranchi 834003,  
Jharkhand, India*

<sup>c</sup>*Department of Zoology, Institute of Science, Banaras Hindu University, Varanasi  
221005, Uttar Pradesh, India.*

*E-mail: drkaushalbhu@yahoo.co.in; kku@bhu.ac.in, Tel No.: +91-542-6702488*

---

**EXPERIMENTAL**

**1.1 Apparatus:**

The IR Spectra for the probe **P1** was recorded on Perkin Elmer - FTIR Spectrophotometer while <sup>1</sup>H NMR and <sup>13</sup>C NMR spectra for the same were recorded on a JEOL AL 300 FT NMR Spectrometer. Mass spectrometric analysis was carried out on Bruker amaZon SL spectrometer using ultrascan mode (Bruker Daltonics, Bremen, Germany). Electronic spectra were recorded at room temperature (298 K) on a UV spectrophotometer (Model Name: UV-1800, Manufacturer: SHIMADZU CORPORATION, ANALYTICAL & MEASURING INSTRUMENTS DIVISION) with quartz cuvette (path length=1 cm). Emission spectra were recorded on Fluorolog R-3 spectrofluorometer (Model Name: FL3-11, Manufacturer: JY HORIBA Scientific).

**1.2 Materials:**

All reagents for synthesis were purchased from Sigma-Aldrich and were used without further purification.

**1.3 General Methods:**

All titration experiments were carried at room temperature. All the cations were used as their chloride salts while anions were used as their tetrabutyl-ammonium (TBA) salts. The <sup>1</sup>H NMR spectra were recorded by using tetramethylsilane (TMS) as an internal reference standard. For the <sup>1</sup>H NMR titration spectra of **P1**, 5×10<sup>-3</sup> M solutions were prepared in DMSO-*d*<sub>6</sub> while the stock solution of hydrazine was prepared in DMSO-*d*<sub>6</sub>. For UV-visible/fluorescence titration experiments, the solutions of cations were prepared in aqueous medium. Tetrabutyl Ammonium (TBA) salts of anions were used and their solutions were prepared in DMSO. Due to insufficient

## *Electronic Supplementary Information (ESI)*

solubility of **P1** in pure water its stock solution of  $1 \times 10^{-3}$  M was prepared in DMSO which was used for fluorescence titration experiment in pure PBS buffer (10 mM, pH=7.4) at  $1 \mu\text{M}$  concentration through dilution.

### **1.4 X-ray diffraction studies:**

Single crystals of the receptor **P1** were grown by slow evaporation of saturated solution of receptor **P1** in DMF: MeOH (1:1 v/v) over a period of few weeks. The single crystal X-ray diffraction measurements were carried out on an Oxford Diffraction Xcalibur system with a Ruby CCD detector as well as on a Bruker SMART APEX CCD diffractometer using graphite-monochromated MoK $\alpha$  radiation ( $k = 0.71073 \text{ \AA}$ ). All the determinations of unit cell and intensity data were performed with graphite-monochromated Mo-K $\alpha$  radiation ( $\lambda=0.71073 \text{ \AA}$ ). Data for **P1** was collected at liquid nitrogen temperature. The structures were solved by direct methods, using Fourier techniques and refined by full-matrix least-squares on F2 using the SHELXTL-97 program package. Crystal data and details of the structure determination for receptor **P1** are summarized in **Table 1**. CCDC **1453378 (P1)**, contains the supplementary crystallographic data for this paper. These data can be obtained free of charge from the **Cambridge Crystallographic Data Centre** via <http://www.ccdc.cam.ac.uk/cgi-bin/catreq.cgi>.

### **1.5 Cell Imaging Studies:**

**(a) MTT assay:** Viability of cells was determined through MTT (3-(4,5-dimethylthiazol-2-yl)-2,5-diphenyl-2H-tetrazolium bromide) colorimetric assay. Hela cells were seeded ( $1 \times 10^4$  cells/well) in a 96-well plate and incubated for 24 h at  $37^\circ\text{C}$  and 5%  $\text{CO}_2$ . After 24 h of incubation culture was replaced with media containing **P1** and exposed to varying concentrations for 24 h. Negative control (only media) was also kept for comparison. After required period of incubation, cells were washed with 1X PBS and then  $10 \mu\text{l}$  of MTT solution (HiMedia) ( $5 \text{ mg ml}^{-1}$  stock prepared in 1X PBS) in  $100 \mu\text{l}$  of medium were added in culture and incubated for 3h at  $37^\circ\text{C}$  as a result formazan crystals were formed which was dissolved in  $100 \mu\text{l}$  dimethyl sulfoxide(DMSO) for 15 min for further incubation at  $37^\circ\text{C}$  which develops color that was measured by a micro plate reader (Bio-RAD 680, USA) at 570 nm. All experiments were performed in triplicate, result showing cell viability was presented through a graph.

**(b) Cellular imaging methodology**

For the cell imaging study 60-80 % confluent cells were used for experiment. Trypsinised  $10^5$  HeLa cells were seeded in six well plate having cover slip in each well and allowed to grow in complete media (DMEM with 10% FBS and 1X antibiotic) overnight in a 5% CO<sub>2</sub> incubator at 37°C. After 24h of incubation cells were washed with 1X PBS, then probe P1 was added in media and maintained at 10 μM concentration in solution and incubated for 30 min in 5% CO<sub>2</sub> incubator at 37°C followed by addition of 50 μM concentration of Hydrazine (N<sub>2</sub>H<sub>4</sub>) for 2 h. The confocal projection images in a panel show only P1 and P1 in the presence of hydrazine (P1+ hydrazine). For cell imaging study LSM510-Meta software was used.

**1.6 Determination of Quantum yield ( $\Phi$ )**

For measurement of the quantum yields of **P1** and **P1-N<sub>2</sub>H<sub>4</sub>** we recorded the absorbance of the compounds in pure PBS buffer solution. The emission spectra were recorded using the maximal excitation wavelengths, and the integrated areas of the fluorescence-corrected spectra were measured. The quantum yields were then calculated by comparison with quinine sulphate (0.1M H<sub>2</sub>SO<sub>4</sub>,  $\Phi_s = 0.58$  in water) as reference using the following equation:

$$\Phi_x = \Phi_s \times (I_x/I_s) \times (A_s/A_x) \times (n_x/n_s)^2$$

Where, x & s indicate the unknown and standard solution respectively,  $\Phi$  is the quantum yield,  $I$  is the integrated area under the fluorescence spectra,  $A$  is the absorbance and  $n$  is the refractive index of the solvent.

**1.7 Reaction Kinetic study**

The reaction rate constant of P1 (1.0 μM) with hydrazine (300 equiv.) was estimated assuming a pseudo first- order kinetic. The reaction was monitored at 400 nm at room temperature. The rate constant was determined according to the following equation:

$$\ln [(F_{\max} - F_t)/F_{\max}] = -k't$$

where  $F_t$  and  $F_{\max}$  are the fluorescence intensities at time  $t$ , and the time after completion, respectively. The constant  $k'$  obtained from figure given below.

## Electronic Supplementary Information (ESI)

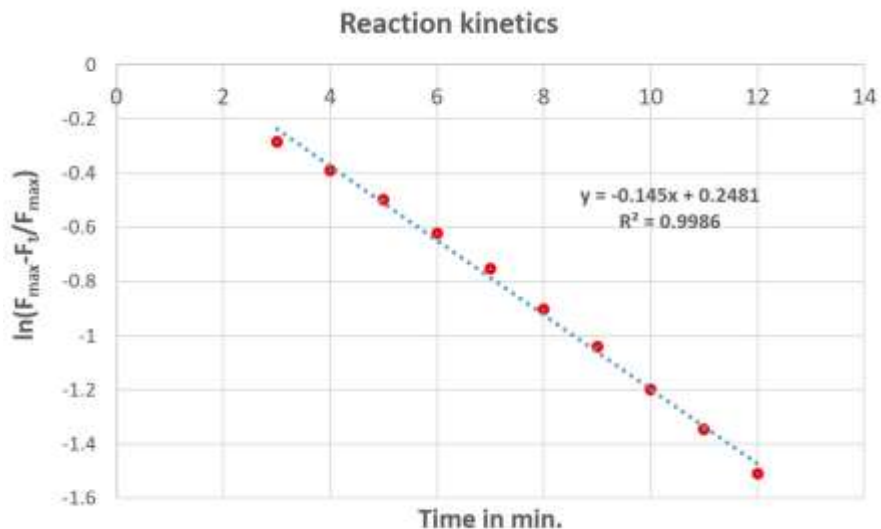

### 1.8 Determination of detection limit:

The detection limit was calculated using UV-visible/fluorescence titration data according to the IUPAC definition [1]. The detection limit of **P1** towards hydrazine was determined from a plot of fluorescence intensity (at 400 nm) as a function of the concentration of the added hydrazine. To determine the S/N ratio, the fluorescence intensity of **P1** in absence of any analyte was measured by 10 times and the standard deviation of blank measurements was determined. The detection was calculated as three times the standard deviation from the blank measurement (in the absence of analyte) divided by the slope of calibration plot between analyte concentration and fluorescence intensity.

**Ref [1]:** (a) IUPAC, *Spectrochim. Acta Part B*, 1978, 33, p. 242; (b) USEPA, Appendix B to Part 136-Definition and Procedure for the Determination of the Method Detection Limit- Revision 1.11, Federal Register 49 (209), 43430, October 26, 1984. Also referred to as "40 CFR Part136.

**Table and Contents**

| <b>S. No.</b> | <b>Figure</b>     | <b>Figure and Captions</b>                                                                                                                                                                                                                                                                                                                                                                                                                                                                                                                                                                                                                                                                                                                                                                                                                                                                                                  | <b>Page No.</b> |
|---------------|-------------------|-----------------------------------------------------------------------------------------------------------------------------------------------------------------------------------------------------------------------------------------------------------------------------------------------------------------------------------------------------------------------------------------------------------------------------------------------------------------------------------------------------------------------------------------------------------------------------------------------------------------------------------------------------------------------------------------------------------------------------------------------------------------------------------------------------------------------------------------------------------------------------------------------------------------------------|-----------------|
| 1.            | <b>Figure S1</b>  | IR spectrum of <b>3</b>                                                                                                                                                                                                                                                                                                                                                                                                                                                                                                                                                                                                                                                                                                                                                                                                                                                                                                     | <b>7</b>        |
| 2.            | <b>Figure S2</b>  | <sup>1</sup> H NMR spectrum of <b>3</b>                                                                                                                                                                                                                                                                                                                                                                                                                                                                                                                                                                                                                                                                                                                                                                                                                                                                                     | <b>8</b>        |
| 3.            | <b>Figure S3</b>  | <sup>13</sup> C NMR spectrum of <b>3</b>                                                                                                                                                                                                                                                                                                                                                                                                                                                                                                                                                                                                                                                                                                                                                                                                                                                                                    | <b>9</b>        |
| 4.            | <b>Figure S4</b>  | IR spectrum of <b>P1</b>                                                                                                                                                                                                                                                                                                                                                                                                                                                                                                                                                                                                                                                                                                                                                                                                                                                                                                    | <b>10</b>       |
| 5.            | <b>Figure S5</b>  | <sup>1</sup> HNMR spectrum of <b>P1</b>                                                                                                                                                                                                                                                                                                                                                                                                                                                                                                                                                                                                                                                                                                                                                                                                                                                                                     | <b>11</b>       |
| 6.            | <b>Figure S6</b>  | <sup>13</sup> C NMR spectrum of <b>P1</b>                                                                                                                                                                                                                                                                                                                                                                                                                                                                                                                                                                                                                                                                                                                                                                                                                                                                                   | <b>12</b>       |
| 7.            | <b>Figure S7</b>  | ESI-MS of <b>P1</b>                                                                                                                                                                                                                                                                                                                                                                                                                                                                                                                                                                                                                                                                                                                                                                                                                                                                                                         | <b>13</b>       |
| 8.            | <b>Figure S8</b>  | IR spectrum of <b>P1-N<sub>2</sub>H<sub>4</sub></b>                                                                                                                                                                                                                                                                                                                                                                                                                                                                                                                                                                                                                                                                                                                                                                                                                                                                         | <b>14</b>       |
| 9.            | <b>Figure S9</b>  | <sup>1</sup> HNMR spectrum of <b>P1- N<sub>2</sub>H<sub>4</sub></b>                                                                                                                                                                                                                                                                                                                                                                                                                                                                                                                                                                                                                                                                                                                                                                                                                                                         | <b>15</b>       |
| 10.           | <b>Figure S10</b> | <sup>13</sup> C NMR spectrum of <b>P1- N<sub>2</sub>H<sub>4</sub></b>                                                                                                                                                                                                                                                                                                                                                                                                                                                                                                                                                                                                                                                                                                                                                                                                                                                       | <b>16</b>       |
| 11.           | <b>Figure S11</b> | ESI-MS of <b>P1- N<sub>2</sub>H<sub>4</sub></b>                                                                                                                                                                                                                                                                                                                                                                                                                                                                                                                                                                                                                                                                                                                                                                                                                                                                             | <b>17</b>       |
| 12.           | <b>Figure S12</b> | UV-Vis response of <b>P1</b> with various amines. R-P1, 1-hydrazine, 2-aniline, 3-4-nitrophenylaniline, 4-ammonia, 5-hydroxylamine, 6-phenylhydrazine, 7-pyridine, 8-ethylamine, 9-triethylamine, 10-methylamine, 11-urea, 12-ethylenediamine, 13-cysteine, 14-benzylamine, 15-thiourea, 16-2,4-dinitrophenylhydrazine, 17-butylamine                                                                                                                                                                                                                                                                                                                                                                                                                                                                                                                                                                                       | <b>18</b>       |
| 13.           | <b>Figure S13</b> | UV-Vis response of <b>P1</b> with various cations and anions. R-P1, 1. Hydrazine, 2-Al <sup>3+</sup> , 3-Cr <sup>3+</sup> , 4-Mn <sup>2+</sup> , 5-Fe <sup>3+</sup> , 6-Co <sup>2+</sup> , 7-Ni <sup>2+</sup> , 8-Cu <sup>2+</sup> , 9-Zn <sup>2+</sup> , 10-Cd <sup>2+</sup> , 11-Hg <sup>2+</sup> , 12-Pb <sup>2+</sup> , 13-S <sub>2</sub> O <sub>3</sub> <sup>2-</sup> , 14-HSO <sub>3</sub> <sup>-</sup> , 15-HSO <sub>4</sub> <sup>-</sup> , 16-HPO <sub>4</sub> <sup>2-</sup> , 17-H <sub>2</sub> PO <sub>4</sub> <sup>-</sup> , 18-PO <sub>4</sub> <sup>3-</sup> , 19-BzO <sup>-</sup> , 20-SO <sub>3</sub> <sup>2-</sup> , 21-S <sup>2-</sup> , 22-F <sup>-</sup> , 23-Cl <sup>-</sup> , 24- Br <sup>-</sup> , 25-I <sup>-</sup> , 26-Aco <sup>-</sup> , 27-PPi, 28-ClO <sub>4</sub> <sup>-</sup> , 29-BF <sub>4</sub> <sup>-</sup>                                                                                | <b>19</b>       |
| 14.           | <b>Figure S14</b> | Absorbance ratio response in the form of bar graph representation and naked eye visual response of <b>P1</b> with various amines. R-P1, 1-hydrazine, 2-aniline, 3-4-nitrophenylaniline, 4-ammonia, 5-hydroxylamine, 6-phenylhydrazine, 7-pyridine, 8-ethylamine, 9-triethylamine, 10-methylamine, 11-urea, 12-ethylenediamine, 13-cysteine, 14-benzylamine, 15-thiourea, 16-2,4-dinitrophenylhydrazine, 17-butylamine                                                                                                                                                                                                                                                                                                                                                                                                                                                                                                       | <b>20</b>       |
| 15.           | <b>Figure S15</b> | Absorbance ratio response in the form of bar graph representation and naked eye visual response of <b>P1</b> with various cations and anions. R-P1, 1-Hydrazine, 2-Al <sup>3+</sup> , 3-Cr <sup>3+</sup> , 4-Mn <sup>2+</sup> , 5-Fe <sup>3+</sup> , 6-Co <sup>2+</sup> , 7-Ni <sup>2+</sup> , 8-Cu <sup>2+</sup> , 9-Zn <sup>2+</sup> , 10-Cd <sup>2+</sup> , 11-Hg <sup>2+</sup> , 12-Pb <sup>2+</sup> , 13-S <sub>2</sub> O <sub>3</sub> <sup>2-</sup> , 14-HSO <sub>3</sub> <sup>-</sup> , 15-HSO <sub>4</sub> <sup>-</sup> , 16-HPO <sub>4</sub> <sup>2-</sup> , 17-H <sub>2</sub> PO <sub>4</sub> <sup>-</sup> , 18-PO <sub>4</sub> <sup>3-</sup> , 19-BzO <sup>-</sup> , 20-SO <sub>3</sub> <sup>2-</sup> , 21-S <sup>2-</sup> , 22-F <sup>-</sup> , 23-Cl <sup>-</sup> , 24- Br <sup>-</sup> , 25-I <sup>-</sup> , 26-Aco <sup>-</sup> , 27-PPi, 28-ClO <sub>4</sub> <sup>-</sup> , 29-BF <sub>4</sub> <sup>-</sup> | <b>21</b>       |

**Electronic Supplementary Information (ESI)**

|            |                   |                                                                                                                                                                                                                                                                                                                                                                                                                                                                                                                                                                                                                                                                                                                                                                                                                                                                                                                                                     |           |
|------------|-------------------|-----------------------------------------------------------------------------------------------------------------------------------------------------------------------------------------------------------------------------------------------------------------------------------------------------------------------------------------------------------------------------------------------------------------------------------------------------------------------------------------------------------------------------------------------------------------------------------------------------------------------------------------------------------------------------------------------------------------------------------------------------------------------------------------------------------------------------------------------------------------------------------------------------------------------------------------------------|-----------|
| <b>16.</b> | <b>Figure S16</b> | Detection limit and calibration curve of probe <b>P1</b> with hydrazine from UV-vis titration data                                                                                                                                                                                                                                                                                                                                                                                                                                                                                                                                                                                                                                                                                                                                                                                                                                                  | <b>22</b> |
| <b>17.</b> | <b>Figure S17</b> | The visual response of <b>P1</b> in presence of various cations and anions under UV light;<br>. R-P1, 1-Hydrazine, 2-Al <sup>3+</sup> , 3-Cr <sup>3+</sup> , 4-Mn <sup>2+</sup> , 5-Fe <sup>3+</sup> , 6-Co <sup>2+</sup> , 7-Ni <sup>2+</sup> , 8-Cu <sup>2+</sup> , 9-Zn <sup>2+</sup> , 10-Cd <sup>2+</sup> , 11-Hg <sup>2+</sup> , 12-Pb <sup>2+</sup> , 13-S <sub>2</sub> O <sub>3</sub> <sup>2-</sup> , 14-HSO <sub>3</sub> <sup>-</sup> , 15-HSO <sub>4</sub> <sup>-</sup> , 16-HPO <sub>4</sub> <sup>2-</sup> , 17-H <sub>2</sub> PO <sub>4</sub> <sup>-</sup> , 18-PO <sub>4</sub> <sup>3-</sup> , 19-BzO <sup>-</sup> , 20-SO <sub>3</sub> <sup>2-</sup> , 21-S <sup>2-</sup> , 22-F <sup>-</sup> , 23-Cl <sup>-</sup> , 24- Br <sup>-</sup> , 25-I <sup>-</sup> , 26-Aco <sup>-</sup> , 27-PPi, 28-ClO <sub>4</sub> <sup>-</sup> , 29-BF <sub>4</sub> <sup>-</sup>                                                                       | <b>23</b> |
| <b>18.</b> | <b>Figure S18</b> | The visual response of <b>P1</b> in presence of various amines under UV light;<br>P1, 1-hydrazine, 2-aniline, 3-4-nitrophenylaniline, 4-ammonia, 5-hydroxylamine, 6-phenylhydrazine, 7-pyridine, 8-ethylamine, 9-triethylamine, 10-methylamine, 11-urea, 12-ethylenediamine, 13-cysteine, 14-benzylamine, 15-thiourea, 16-2,4-dinitrophenylhydrazine, 17-butylamine                                                                                                                                                                                                                                                                                                                                                                                                                                                                                                                                                                                 | <b>24</b> |
| <b>19.</b> | <b>Figure S19</b> | Fluorescence ratio response in the form of bar graph showing competition experiment representation of <b>P1</b> with various cations and anions with hydrazine added. R-P1, 1-Hydrazine, 2-Al <sup>3+</sup> , 3-Cr <sup>3+</sup> , 4-Mn <sup>2+</sup> , 5-Fe <sup>3+</sup> , 6-Co <sup>2+</sup> , 7-Ni <sup>2+</sup> , 8-Cu <sup>2+</sup> , 9-Zn <sup>2+</sup> , 10-Cd <sup>2+</sup> , 11-Hg <sup>2+</sup> , 12-Pb <sup>2+</sup> , 13-S <sub>2</sub> O <sub>3</sub> <sup>2-</sup> , 14-HSO <sub>3</sub> <sup>-</sup> , 15-HSO <sub>4</sub> <sup>-</sup> , 16-HPO <sub>4</sub> <sup>2-</sup> , 17-H <sub>2</sub> PO <sub>4</sub> <sup>-</sup> , 18-PO <sub>4</sub> <sup>3-</sup> , 19-BzO <sup>-</sup> , 20-SO <sub>3</sub> <sup>2-</sup> , 21-S <sup>2-</sup> , 22-F <sup>-</sup> , 23-Cl <sup>-</sup> , 24- Br <sup>-</sup> , 25-I <sup>-</sup> , 26-Aco <sup>-</sup> , 27-PPi, 28-ClO <sub>4</sub> <sup>-</sup> , 29-BF <sub>4</sub> <sup>-</sup> | <b>25</b> |
| <b>20.</b> | <b>Figure S20</b> | Fluorescence ratio response in the form of bar graph showing competition experiment representation of <b>P1</b> various amines with hydrazine added. R- <b>P1</b> , 1-hydrazine, 2-aniline, 3-4-nitrophenylaniline, 4-ammonia, 5-hydroxylamine, 6-phenylhydrazine, 7-pyridine, 8-ethylamine, 9-triethylamine, 10-methylamine, 11-urea, 12-ethylenediamine, 13-cysteine, 14-benzylamine, 15-thiourea, 16-2,4-dinitrophenylhydrazine, 17-butylamine                                                                                                                                                                                                                                                                                                                                                                                                                                                                                                   | <b>26</b> |
| <b>21.</b> | <b>Figure S21</b> | The variation in fluorescence intensity in <b>P1</b> with the change in pH in the presence of hydrazine                                                                                                                                                                                                                                                                                                                                                                                                                                                                                                                                                                                                                                                                                                                                                                                                                                             | <b>27</b> |
| <b>22.</b> | <b>Figure S22</b> | Cell viability of <b>P1</b> at different concentration in 24 hrs.                                                                                                                                                                                                                                                                                                                                                                                                                                                                                                                                                                                                                                                                                                                                                                                                                                                                                   | <b>28</b> |
| <b>23.</b> | <b>Table 1</b>    | Crystal data of <b>P1</b>                                                                                                                                                                                                                                                                                                                                                                                                                                                                                                                                                                                                                                                                                                                                                                                                                                                                                                                           | <b>29</b> |

*Electronic Supplementary Information (ESI)*

**Figure S1:** IR spectrum of **3**:

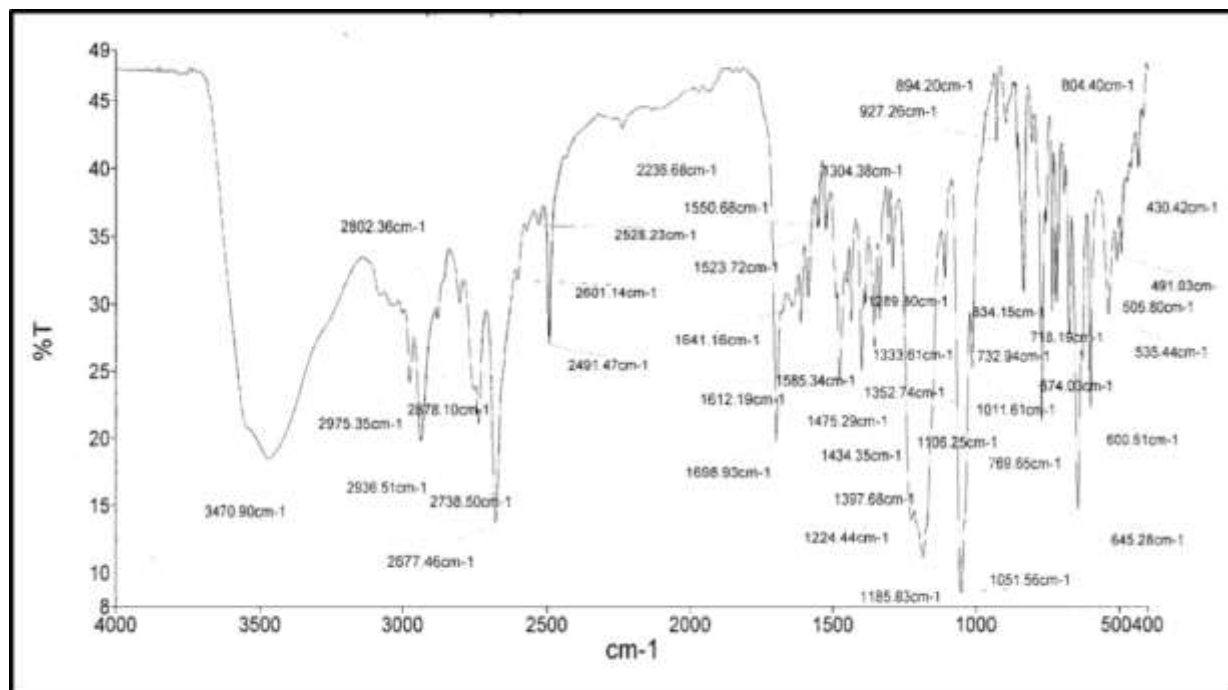

*Electronic Supplementary Information (ESI)*

**Figure S2:**  $^1\text{H}$  NMR spectrum of **3**:

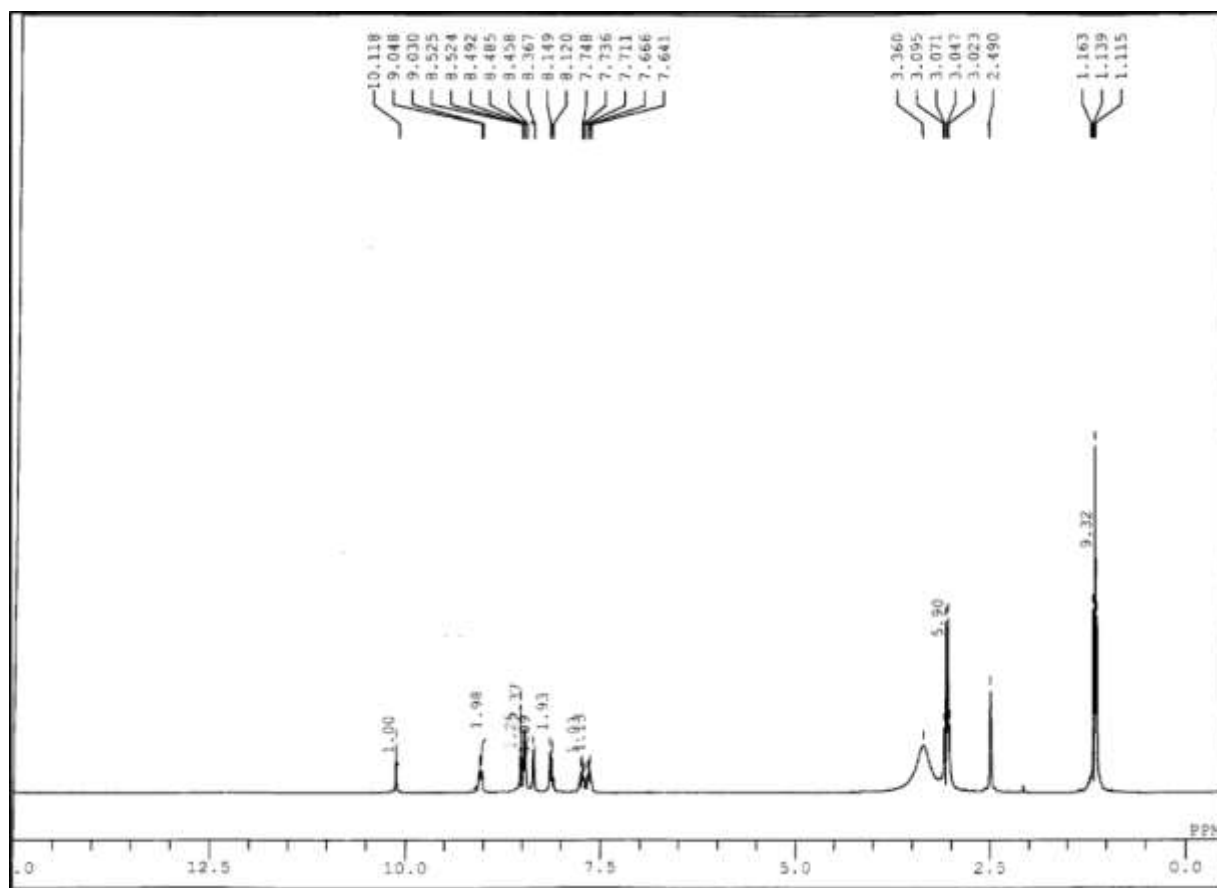



*Electronic Supplementary Information (ESI)*

**Figure S3:**  $^{13}\text{C}$  NMR spectrum of **3**:

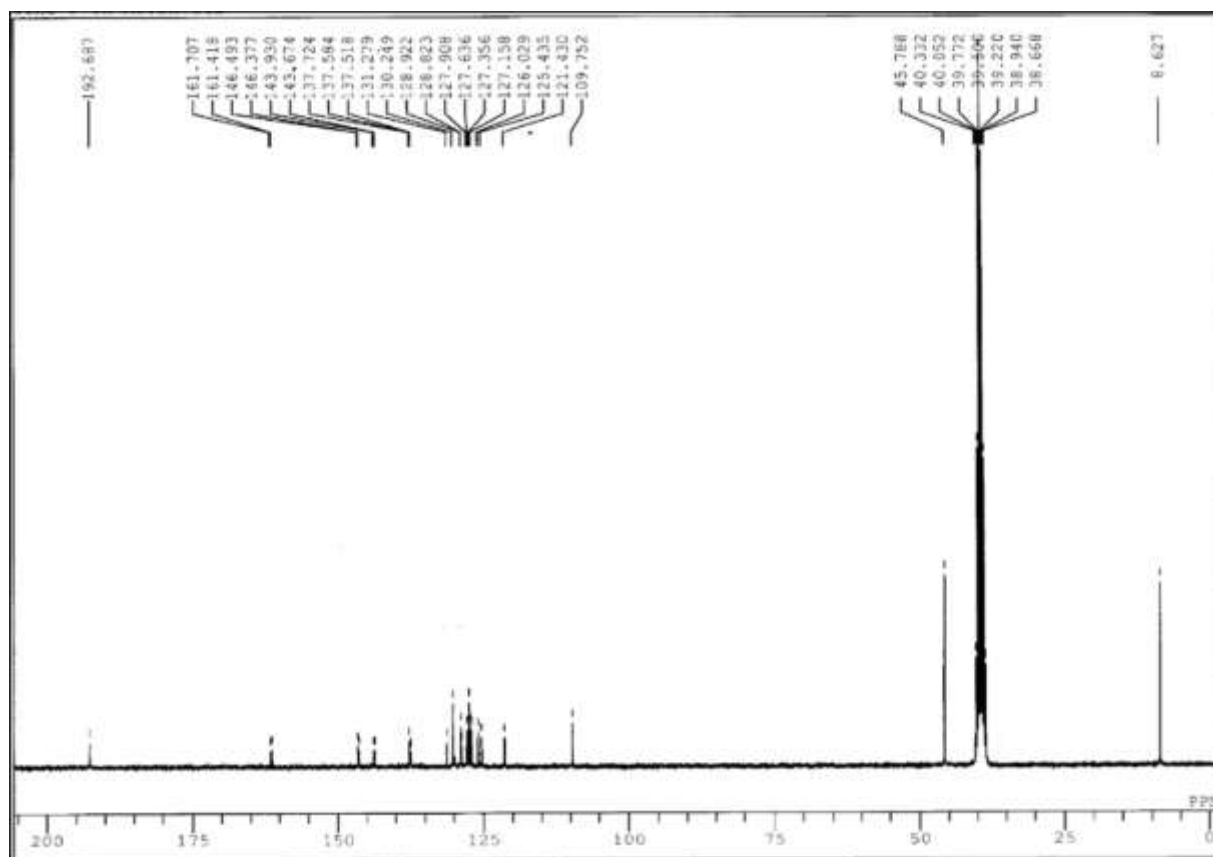

*Electronic Supplementary Information (ESI)*

**Figure S4:** IR spectrum of **P1**:

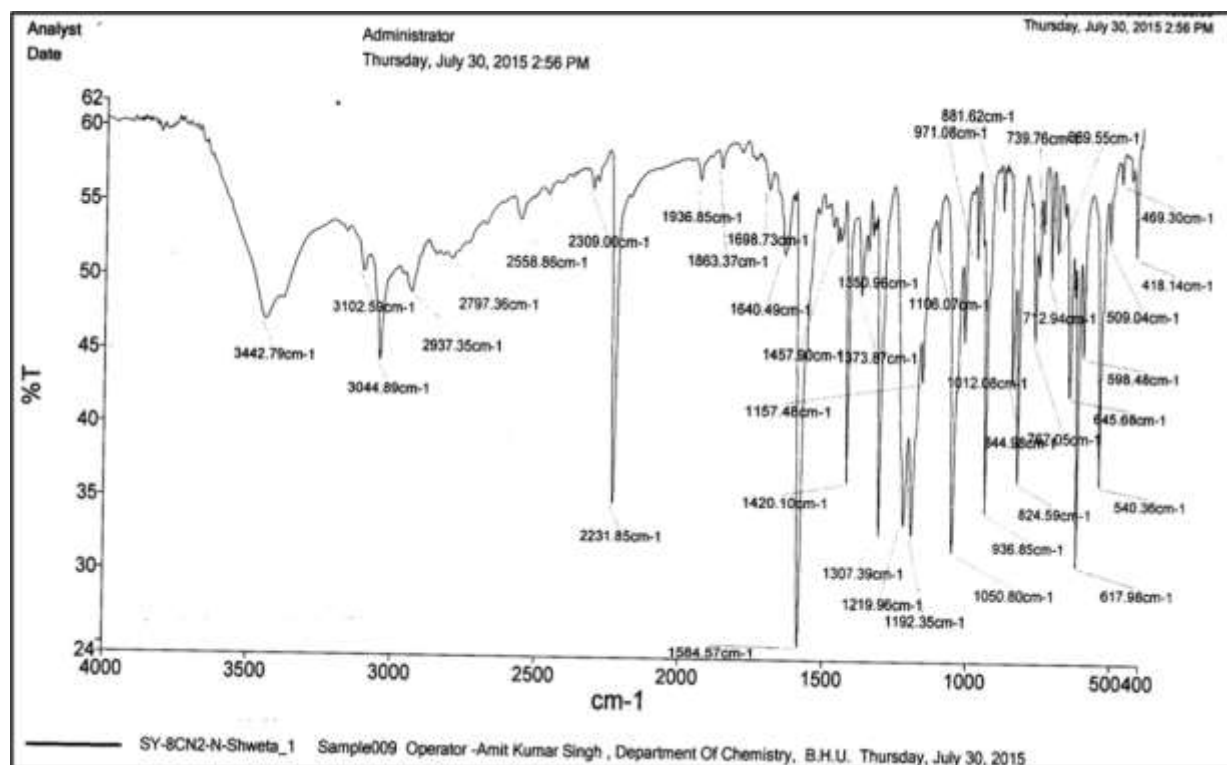

*Electronic Supplementary Information (ESI)*

**Figure S5:**  $^1\text{H}$  NMR spectrum of **P1**

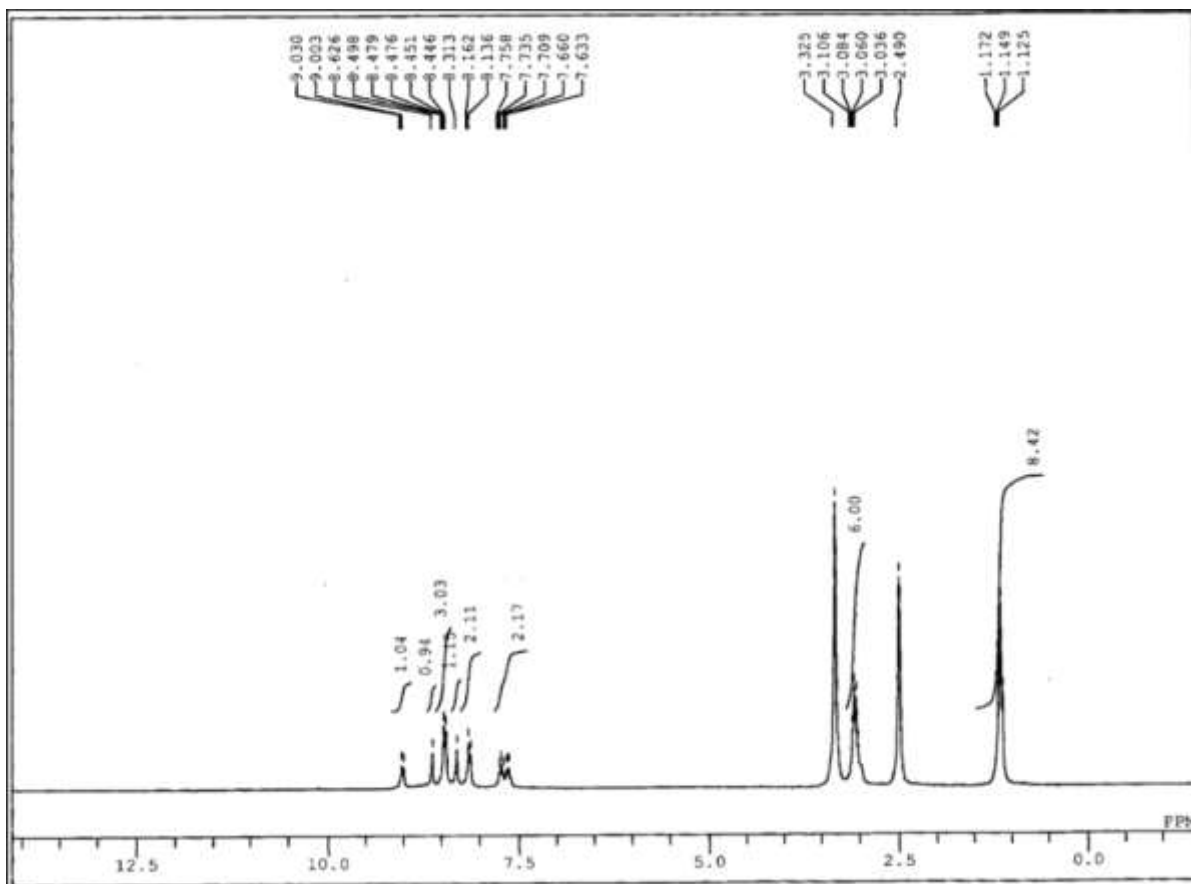

*Electronic Supplementary Information (ESI)*

**Figure S6:**  $^{13}\text{C}$  NMR spectrum of **P1**

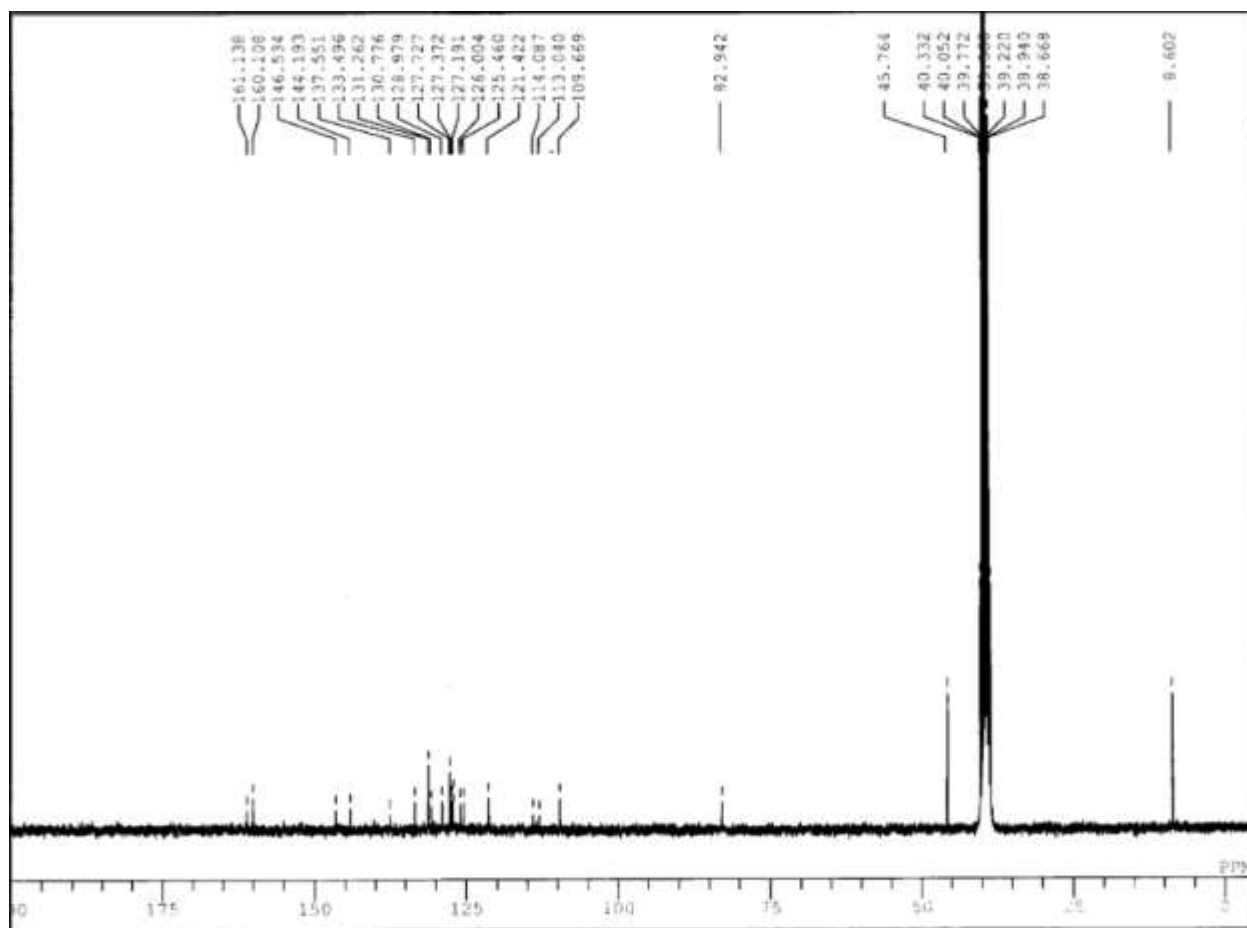

Electronic Supplementary Information (ESI)

Figure S7: ESI-MS spectrum of P1

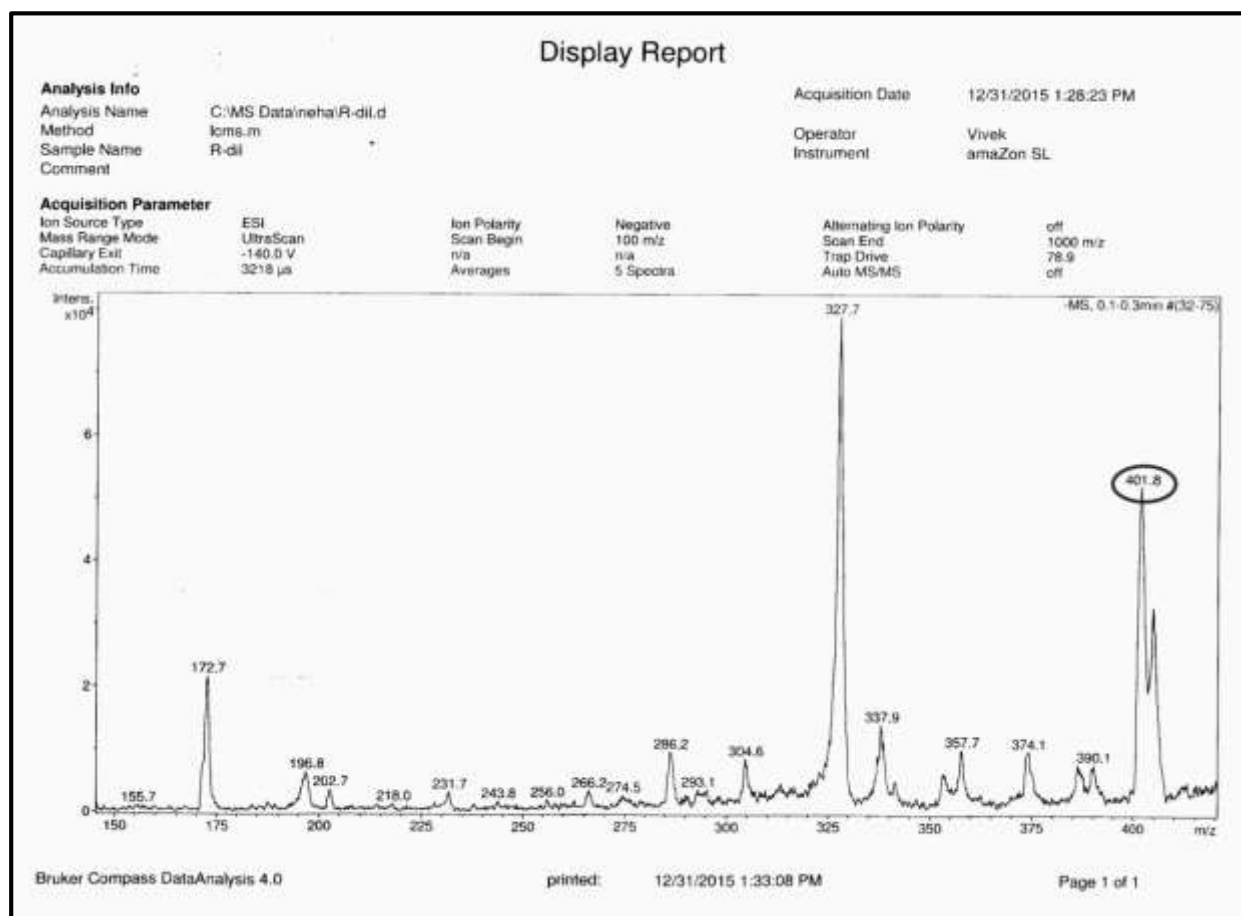

*Electronic Supplementary Information (ESI)*

**Figure S8:** IR spectrum of **P1-N<sub>2</sub>H<sub>4</sub>**

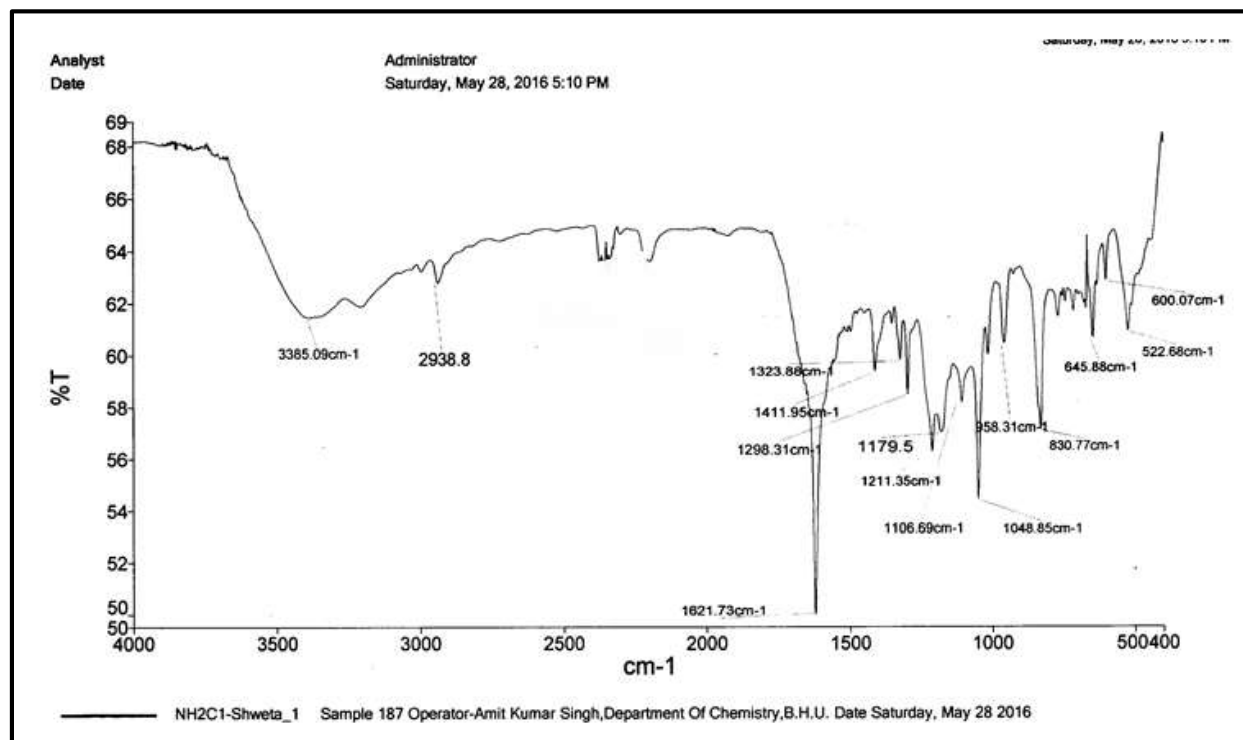

*Electronic Supplementary Information (ESI)*

**Figure S9:**  $^1\text{H}$  NMR spectrum of **P1-N<sub>2</sub>H<sub>4</sub>**

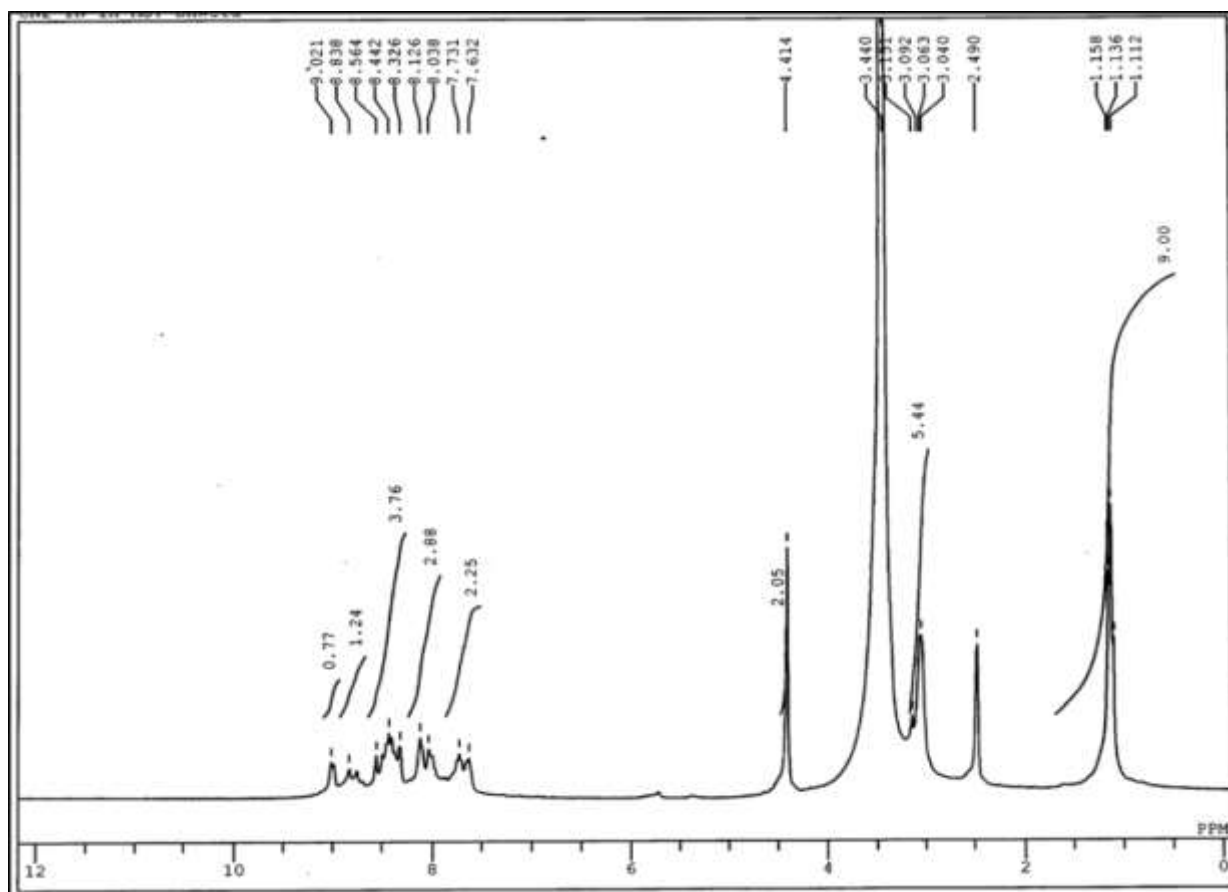

*Electronic Supplementary Information (ESI)*

**Figure S10:**  $^{13}\text{C}$ NMR spectrum of **P1-N<sub>2</sub>H<sub>4</sub>**

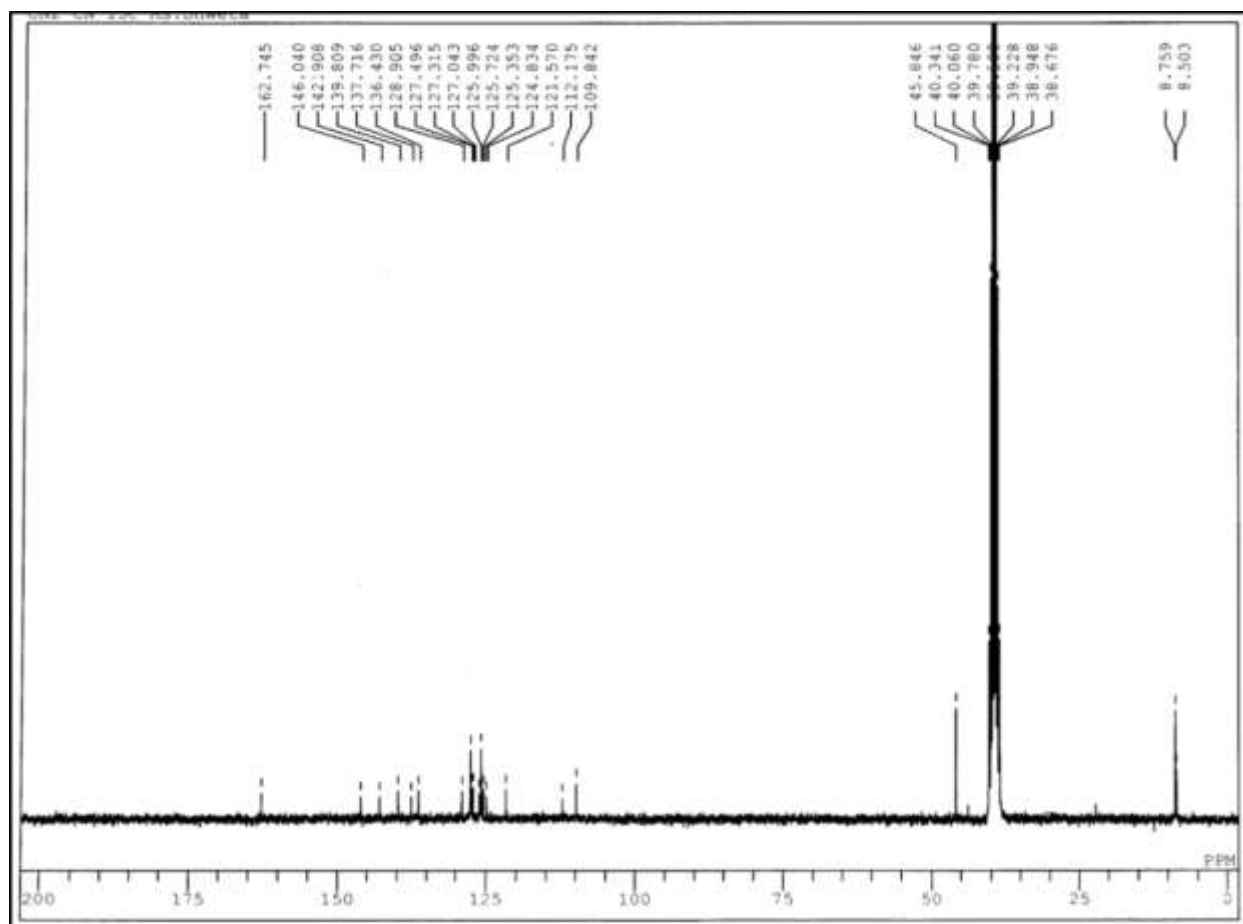



Electronic Supplementary Information (ESI)

Figure S11: ESI-MS spectrum of P1-N<sub>2</sub>H<sub>4</sub>

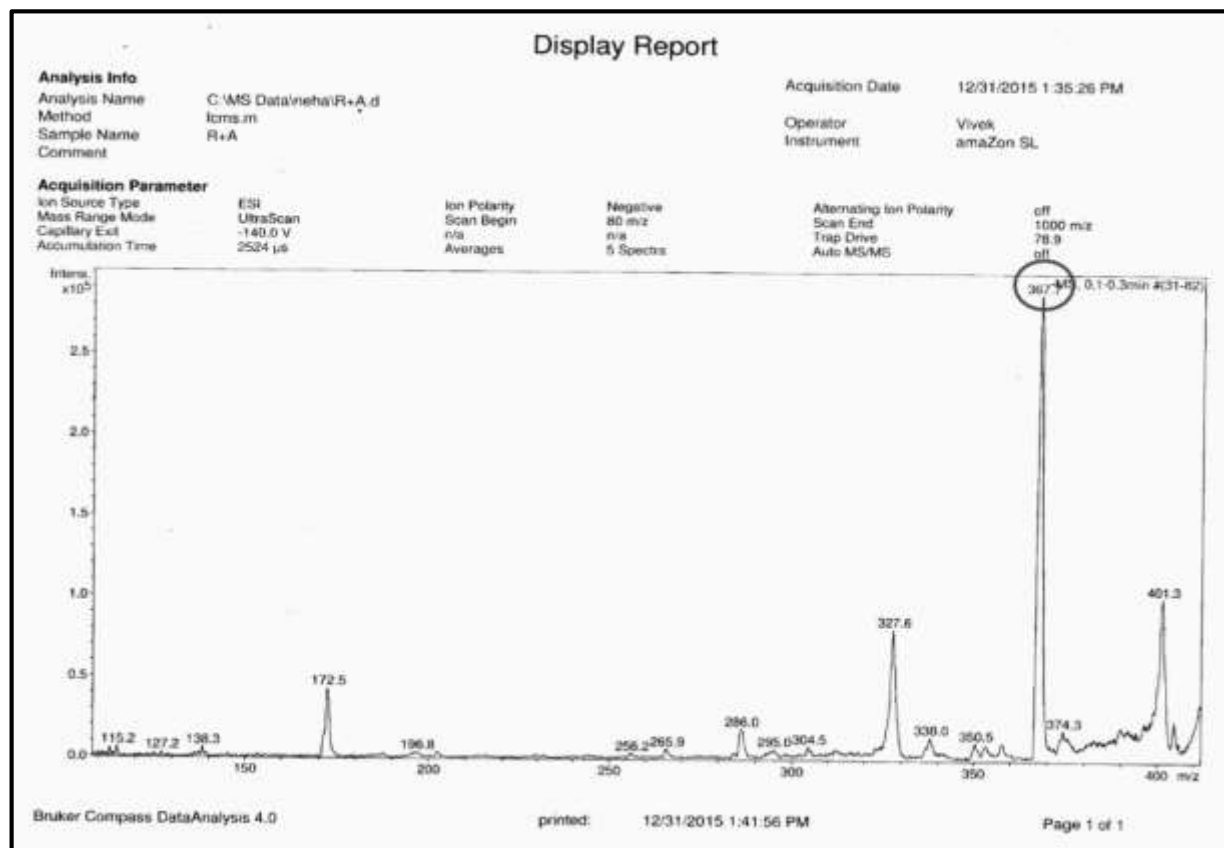

*Electronic Supplementary Information (ESI)*

**Figure S12:** UV-Vis response of **P1** with various amines. R-**P1**, 1-hydrazine, 2-aniline, 3-4-nitrophenylaniline, 4-ammonia, 5-hydroxylamine, 6-phenylhydrazine, 7-pyridine, 8-ethylamine, 9-triethylamine, 10-methylamine, 11-urea, 12-ethylenediamine, 13-cysteine, 14-benzylamine, 15-thiourea, 16-2,4-dinitrophenylhydrazine, 17-butylamine:

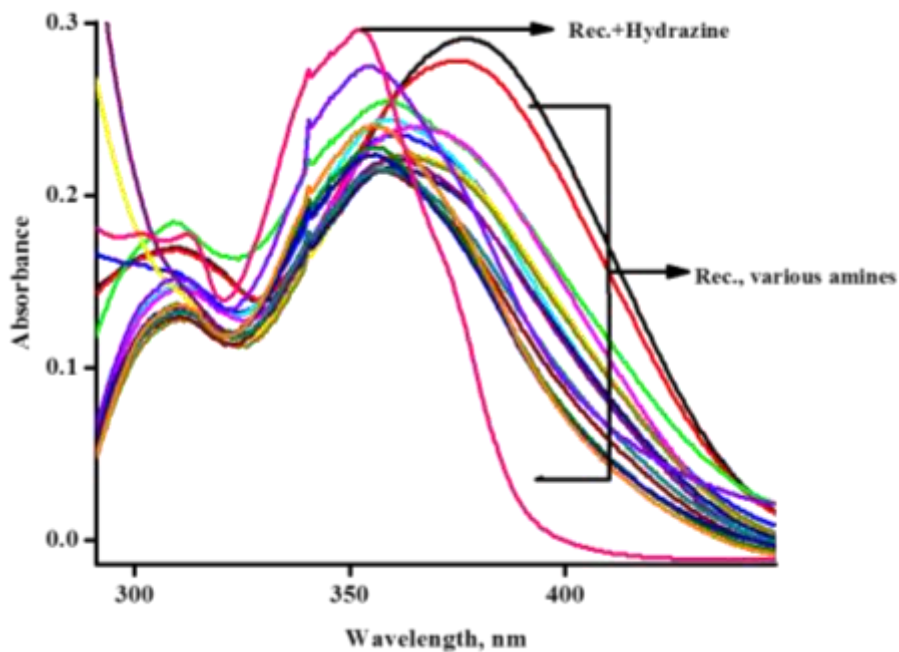

*Electronic Supplementary Information (ESI)*

**Figure S13:** UV-Vis response of **P1** with various cations and anions. R-P1, 1. Hydrazine, 2-Al<sup>3+</sup>, 3-Cr<sup>3+</sup>, 4-Mn<sup>2+</sup>, 5-Fe<sup>3+</sup>, 6-Co<sup>2+</sup>, 7-Ni<sup>2+</sup>, 8-Cu<sup>2+</sup>, 9-Zn<sup>2+</sup>, 10-Cd<sup>2+</sup>, 11-Hg<sup>2+</sup>, 12-Pb<sup>2+</sup>, 13-S<sub>2</sub>O<sub>3</sub><sup>2-</sup>, 14-HSO<sub>3</sub><sup>-</sup>, 15-HSO<sub>4</sub><sup>-</sup>, 16-HPO<sub>4</sub><sup>2-</sup>, 17-H<sub>2</sub>PO<sub>4</sub><sup>-</sup>, 18-PO<sub>4</sub><sup>2-</sup>, 19-BzO<sup>-</sup>, 20-SO<sub>3</sub><sup>2-</sup>, 21-S<sup>2-</sup>, 22-F<sup>-</sup>, 23-Cl<sup>-</sup>, 24- Br<sup>-</sup>, 25-I<sup>-</sup>, 26-Aco<sup>-</sup>, 27-PPI, 28-ClO<sub>4</sub><sup>-</sup>, 29-BF<sub>4</sub><sup>-</sup>:

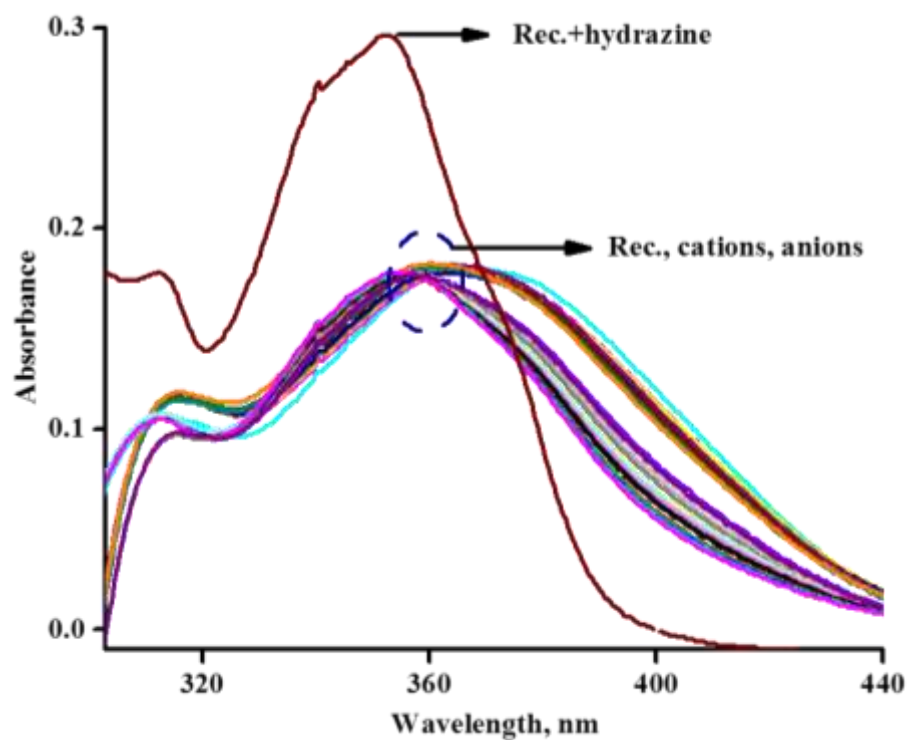

### Electronic Supplementary Information (ESI)

**Figure S14:** Absorbance ratio response in the form of bar graph representation and naked eye visual response of **P1** with various amines. R-**P1**, 1-hydrazine, 2-aniline, 3-4-nitrophenylaniline, 4-ammonia, 5-hydroxylamine, 6-phenylhydrazine, 7-pyridine, 8-ethylamine, 9-triethylamine, 10-methylamine, 11-urea, 12-ethylenediamine, 13-cysteine, 14-benzylamine, 15-thiourea, 16-2,4-dinitrophenylhydrazine, 17-butylamine, 18- Semicarbazide (SC), 19- Thiocarbohydrazide (TCH), 20- Carbohydrazide (CH), 21-  $\text{KMnO}_4$ , 22-  $\text{K}_2\text{Cr}_2\text{O}_7$ , 23- $\text{H}_2\text{O}_2$

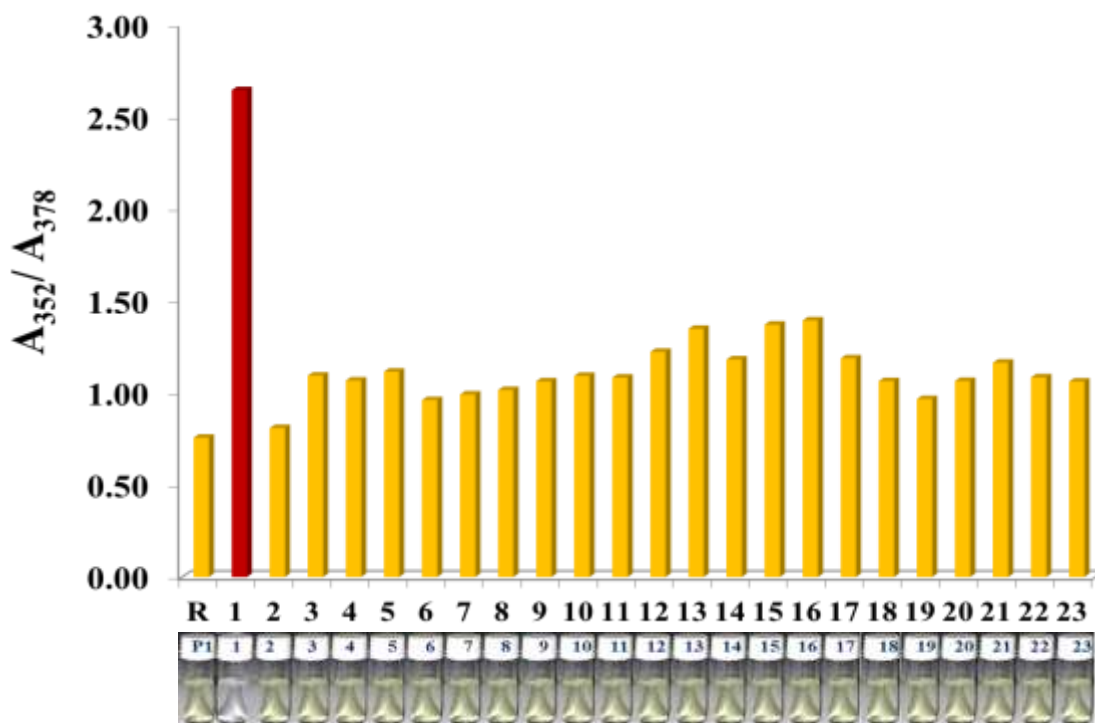

*Electronic Supplementary Information (ESI)*

**Figure S15:** Absorbance ratio response in the form of bar graph representation and naked eye visual response of **P1** with various cations and anions. R-P1, 1-Hydrazine, 2-Al<sup>3+</sup>, 3-Cr<sup>3+</sup>, 4-Mn<sup>2+</sup>, 5-Fe<sup>3+</sup>, 6-Co<sup>2+</sup>, 7-Ni<sup>2+</sup>, 8-Cu<sup>2+</sup>, 9-Zn<sup>2+</sup>, 10-Cd<sup>2+</sup>, 11-Hg<sup>2+</sup>, 12-Pb<sup>2+</sup>, 13-S<sub>2</sub>O<sub>3</sub><sup>2-</sup>, 14-HSO<sub>3</sub><sup>-</sup>, 15-HSO<sub>4</sub><sup>-</sup>, 16-HPO<sub>4</sub><sup>2-</sup>, 17-H<sub>2</sub>PO<sub>4</sub><sup>-</sup>, 18-PO<sub>4</sub><sup>3-</sup>, 19-BzO<sup>-</sup>, 20-SO<sub>3</sub><sup>2-</sup>, 21-S<sup>2-</sup>, 22-F<sup>-</sup>, 23-Cl<sup>-</sup>, 24-Br<sup>-</sup>, 25-I<sup>-</sup>, 26-Aco<sup>-</sup>, 27-PPi, 28-ClO<sub>4</sub><sup>-</sup>, 29-BF<sub>4</sub><sup>-</sup>:

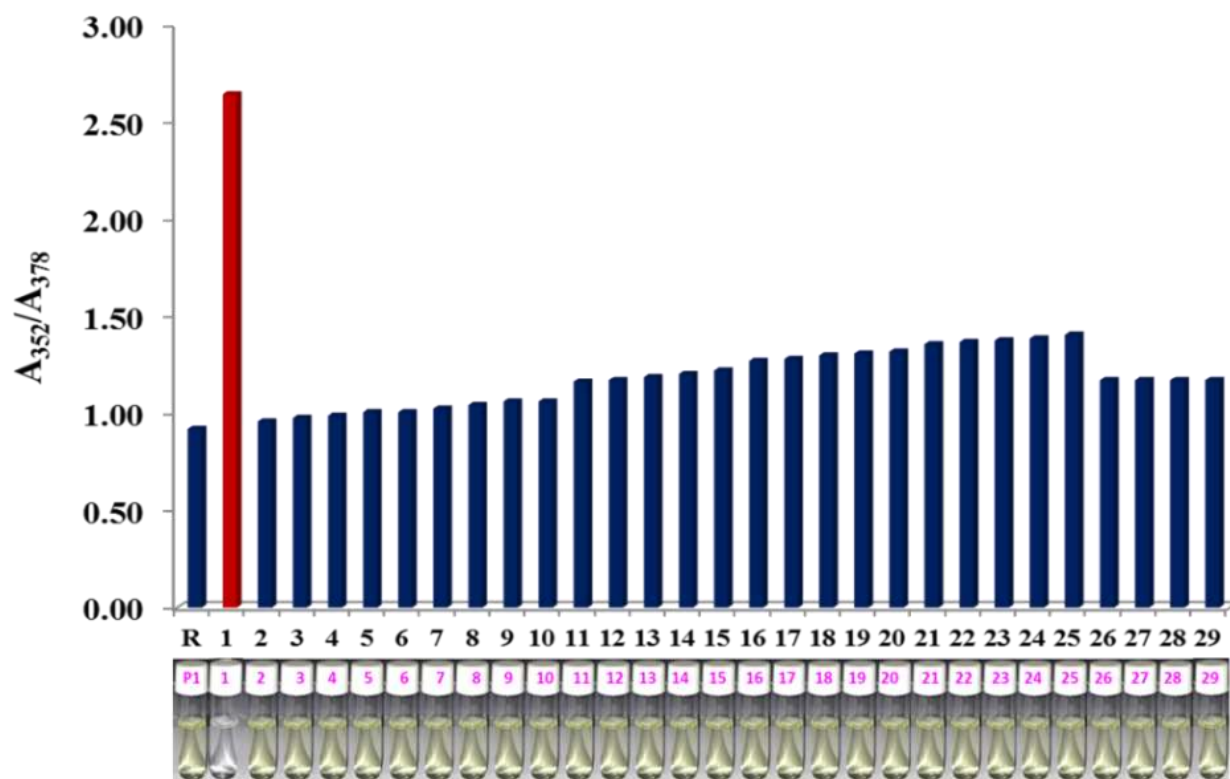

*Electronic Supplementary Information (ESI)*

**Figure S16:** Detection limit and calibration curve of probe **P1** with hydrazine from UV-Vis. titration data

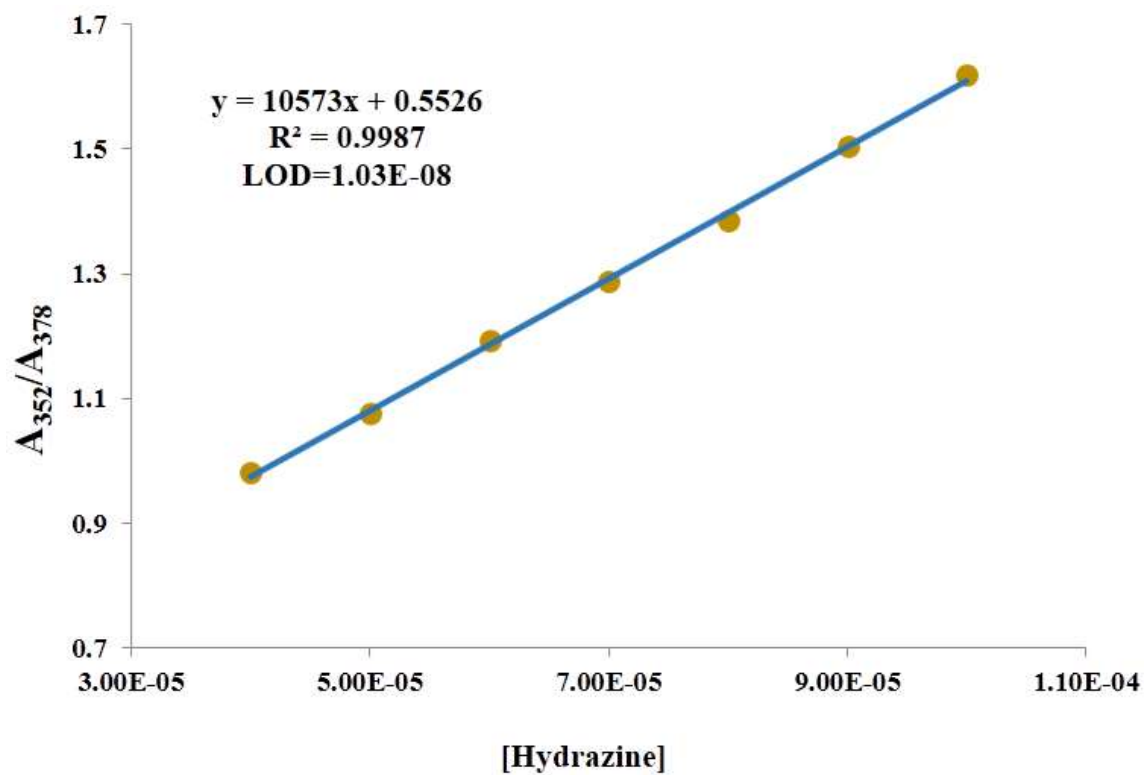

*Electronic Supplementary Information (ESI)*

**Figure S17:** The visual response of **P1** in presence of various cations and anions under UV light;

P1, 1-Hydrazine, 2-Al<sup>3+</sup>, 3-Cr<sup>3+</sup>, 4-Mn<sup>2+</sup>, 5-Fe<sup>3+</sup>, 6-Co<sup>2+</sup>, 7-Ni<sup>2+</sup>, 8-Cu<sup>2+</sup>, 9-Zn<sup>2+</sup>, 10-Cd<sup>2+</sup>, 11-Hg<sup>2+</sup>, 12-Pb<sup>2+</sup>, 13-S<sub>2</sub>O<sub>3</sub><sup>2-</sup>, 14-HSO<sub>3</sub><sup>-</sup>, 15-HSO<sub>4</sub><sup>-</sup>, 16-HPO<sub>4</sub><sup>2-</sup>, 17-H<sub>2</sub>PO<sub>4</sub><sup>-</sup>, 18-PO<sub>4</sub><sup>3-</sup>, 19-BzO<sup>-</sup>, 20-SO<sub>3</sub><sup>2-</sup>, 21-S<sup>2-</sup>, 22-F<sup>-</sup>, 23-Cl<sup>-</sup>, 24- Br<sup>-</sup>, 25-I<sup>-</sup>, 26-Aco<sup>-</sup>, 27-PPi, 28-ClO<sub>4</sub><sup>-</sup>, 29-BF<sub>4</sub><sup>-</sup>

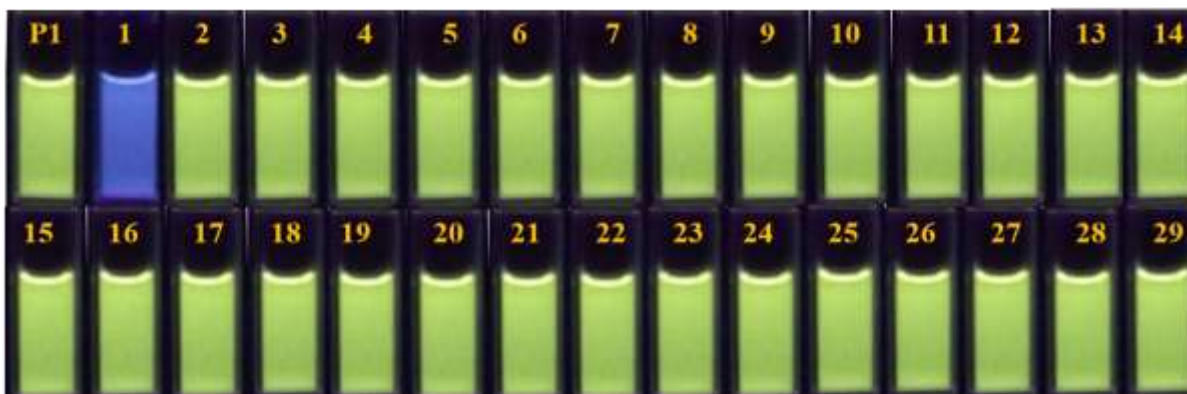

*Electronic Supplementary Information (ESI)*

**Figure S18:** The visual response of **P1** in presence of various amines under UV light; **P1**, **1**-hydrazine, **2**-aniline, **3**-4-nitrophenylaniline, **4**-ammonia, **5**-hydroxylamine, **6**-phenylhydrazine, **7**-pyridine, **8**-ethylamine, **9**-triethylamine, **10**-methylamine, **11**-urea, **12**-ethylenediamine, **13**-cysteine, **14**-benzylamine, **15**-thiourea, **16**-2,4-dinitrophenylhydrazine, **17**-butylamine, **18**- Semicarbazide (SC), **19**- Thiocarbohydrazide (TCH), **20**- Carbohydrazide (CH), **21**-  $\text{KMnO}_4$ , **22**-  $\text{K}_2\text{Cr}_2\text{O}_7$ , **23**- $\text{H}_2\text{O}_2$

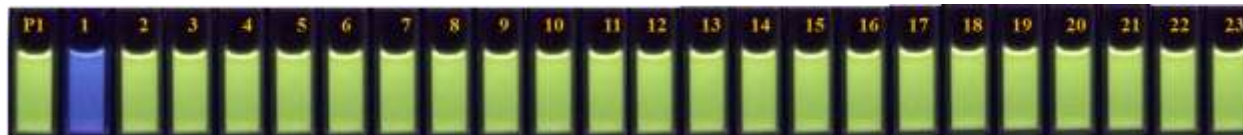



*Electronic Supplementary Information (ESI)*

**Figure S19:** Fluorescence ratio response in the form of bar graph showing competition experiment representation of **P1** with various cations and anions with hydrazine added. R-**P1**, 1-Hydrazine, 2-Al<sup>3+</sup>, 3-Cr<sup>3+</sup>, 4-Mn<sup>2+</sup>, 5-Fe<sup>3+</sup>, 6-Co<sup>2+</sup>, 7-Ni<sup>2+</sup>, 8-Cu<sup>2+</sup>, 9-Zn<sup>2+</sup>, 10-Cd<sup>2+</sup>, 11-Hg<sup>2+</sup>, 12-Pb<sup>2+</sup>, 13-S<sub>2</sub>O<sub>3</sub><sup>2-</sup>, 14-HSO<sub>3</sub><sup>-</sup>, 15-HSO<sub>4</sub><sup>-</sup>, 16-HPO<sub>4</sub><sup>2-</sup>, 17-H<sub>2</sub>PO<sub>4</sub><sup>-</sup>, 18-PO<sub>4</sub><sup>3-</sup>, 19-BzO<sup>-</sup>, 20-SO<sub>3</sub><sup>2-</sup>, 21-S<sup>2-</sup>, 22-F<sup>-</sup>, 23-Cl<sup>-</sup>, 24- Br<sup>-</sup>, 25-I<sup>-</sup>, 26-Aco<sup>-</sup>, 27-PPi, 28-ClO<sub>4</sub><sup>-</sup>, 29-BF<sub>4</sub><sup>-</sup>:

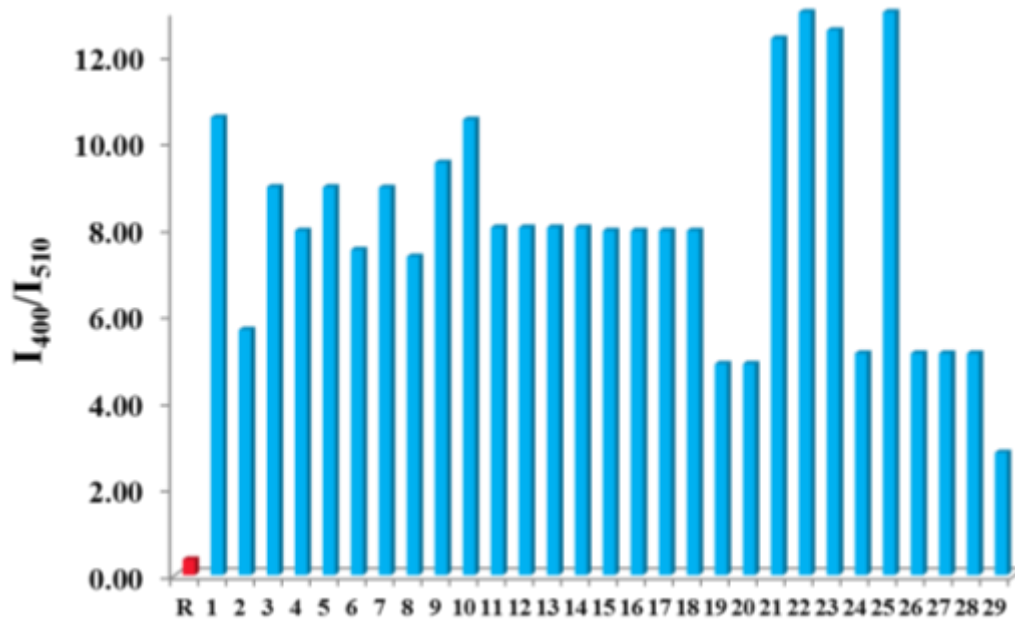

*Electronic Supplementary Information (ESI)*

**Figure S20:** Fluorescence ratio response in the form of bar graph showing competition experiment representation of **P1** various amines with hydrazine added. R-**P1**, 1-hydrazine, 2-aniline, 3-4-nitrophenylaniline, 4-ammonia, 5-hydroxylamine, 6-phenylhydrazine, 7-pyridine, 8-ethylamine, 9-triethylamine, 10-methylamine, 11-urea, 12-ethylenediamine, 13-cysteine, 14-benzylamine, 15-thiourea, 16-2,4-dinitrophenylhydrazine, 17-butylamine, 18- Semicarbazide (SC), 19- Thiocarbohydrazide (TCH), 20- Carbohydrazide (CH), 21-  $\text{KMnO}_4$ , 22-  $\text{K}_2\text{Cr}_2\text{O}_7$ , 23- $\text{H}_2\text{O}_2$

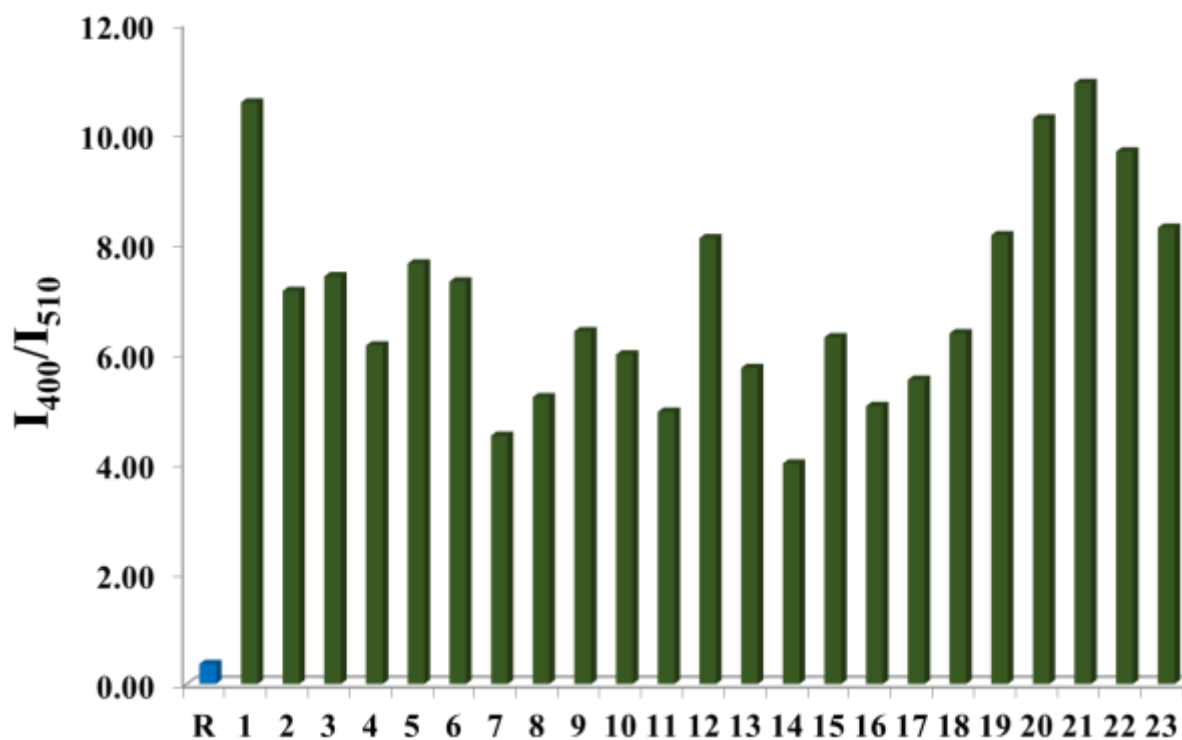

*Electronic Supplementary Information (ESI)*

**Figure S21:** The variation in fluorescence intensity in **P1** with the change in pH in the presence of hydrazine

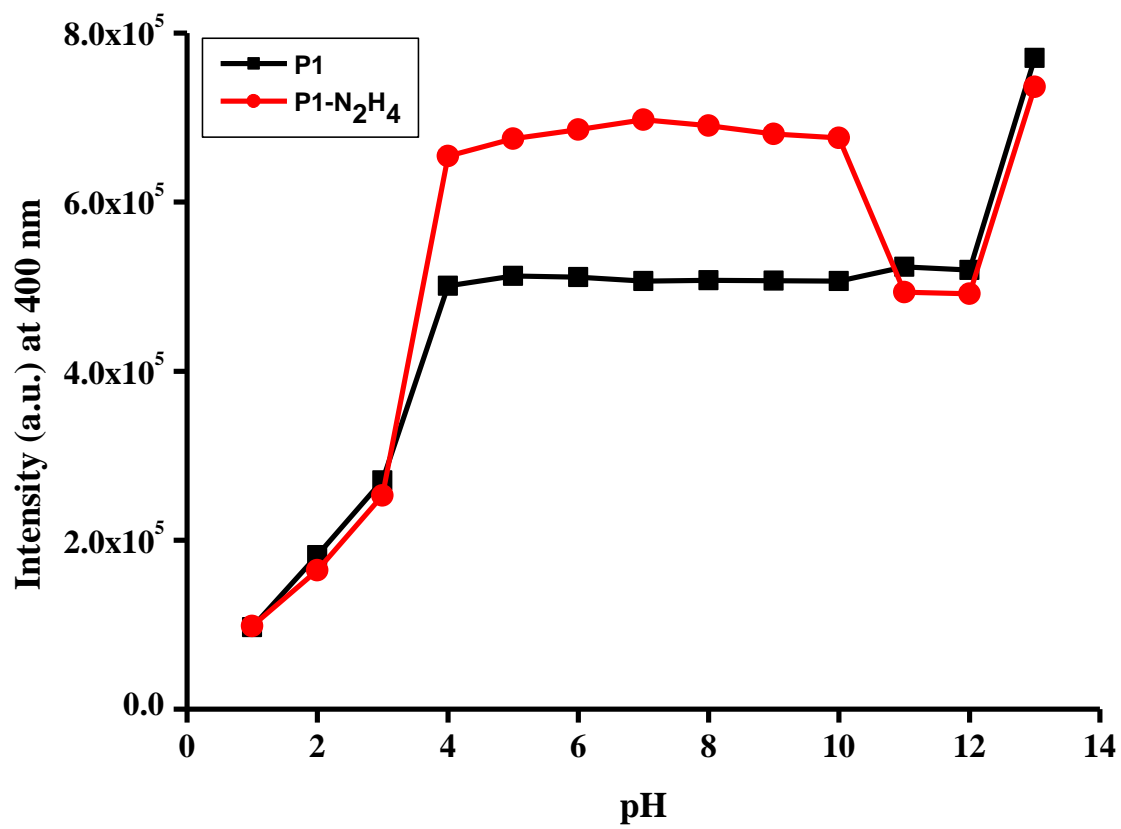

**Figure S22:** Cell viability of **P1** at different concentration in 24 hrs.

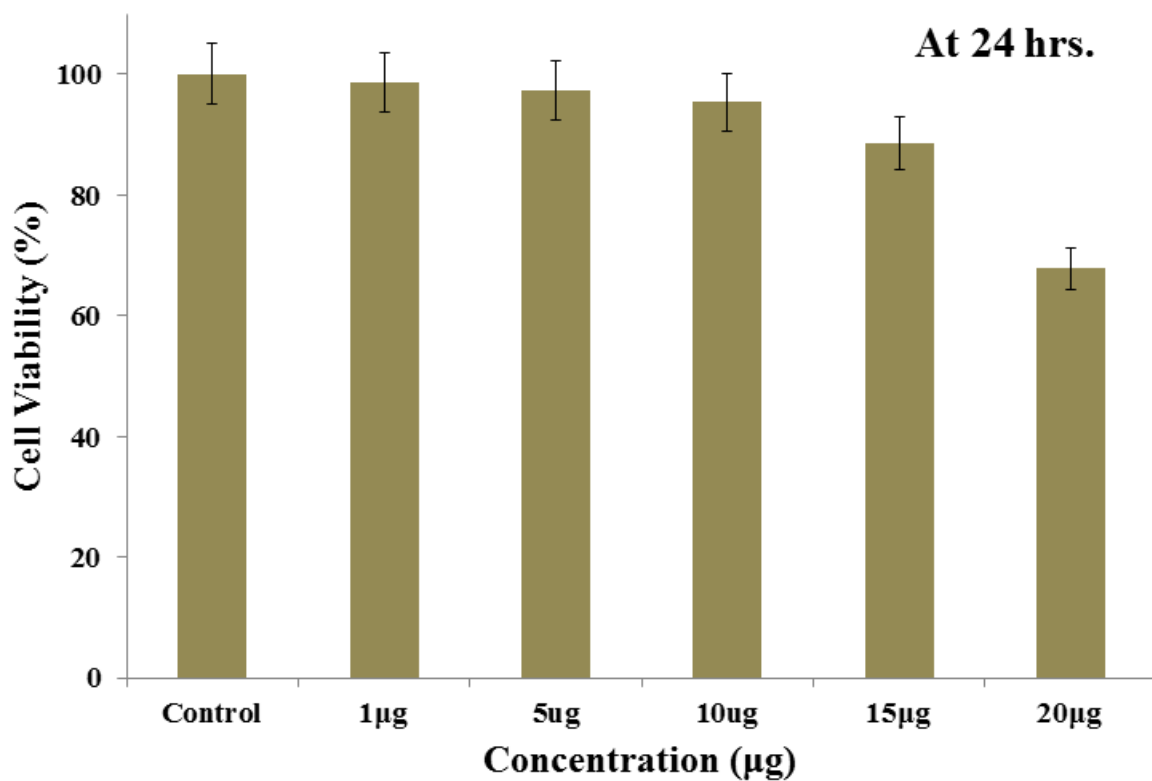

**Electronic Supplementary Information (ESI)**

**Table 1** Crystal data of **P1**

| <b>Identification code</b>        | <b>P1</b>                                                                                                                      |
|-----------------------------------|--------------------------------------------------------------------------------------------------------------------------------|
| CCDC number                       | 1453378                                                                                                                        |
| Empirical formula                 | $C_{48}H_{36}N_7O_8S_2$                                                                                                        |
| Formula weight                    | 902.96                                                                                                                         |
| Temperature/K                     | 100                                                                                                                            |
| Wavelength                        | 0.71073 Å                                                                                                                      |
| Crystal system, space group       | Triclinic, P-1                                                                                                                 |
| Unit cell dimensions              | a = 6.817(5) Å    alpha = 103.091(5) deg.<br>b = 18.957(5) Å,    beta=90.526(5) deg.<br>c = 20.898(5) Å, gamma =94.227(5) deg. |
| Volume                            | 2622(2)Å <sup>3</sup>                                                                                                          |
| Absorption coefficient            | 0.155 mm <sup>-1</sup>                                                                                                         |
| F(000)                            | 938.0                                                                                                                          |
| Crystal size                      | 0.3 × 0.2 × 0.1mm                                                                                                              |
| Theta range for data collection   | 5.994 to 56.766 deg.                                                                                                           |
| Limiting indices                  | -9 ≤ h ≤ 9, -25 ≤ k ≤ 25, -27 ≤ l ≤ 27                                                                                         |
| Reflections collected / unique    | 51549 / 12607 [R <sub>int</sub> = 0.0901]                                                                                      |
| Completeness to theta = 28.383    | 98.0 %                                                                                                                         |
| Refinement method                 | Full-matrix least-squares on F <sup>2</sup>                                                                                    |
| Data / restraints / parameters    | 12607/0/589                                                                                                                    |
| Goodness-of-fit on F <sup>2</sup> | 0.984                                                                                                                          |
| Final R indices [I > 2sigma(I)]   | R1 = 0.0881, wR2 = 0.2092                                                                                                      |
| R indices (all data)              | R1 = 0.1450, wR2 = 0.2315                                                                                                      |
| Largest diff. peak and hole       | 2.04/-0.44 e.Å <sup>-3</sup>                                                                                                   |
